# Supplementary material for: Protocol for a prospective cohort study on pre-eclampsia risk prediction in Ghana, Kenya and South Africa
Source: Reprod Health. 2025 Oct 27;22:209. doi: 10.1186/s12978-025-02156-1 (PMC12560518; doi:10.1186/s12978-025-02156-1)
Supplement: Supplementary file 1 — Supplementary Material 1. [file 12978_2025_2156_MOESM1_ESM.docx]

## Appendix A - List of study sites

| Ghana | |
| --- | --- |
| Tertiary referral hospitals | Korle Bu Teaching Hosp |
| Greater Accra Regional Hospital |
| District Hospitals | Achimota Hospital |
| Mamprobi Hospital |
| Maamobi General Hospital |
| LEKMA Hospital |
| Ga West Municipal Hospital (Amasaman) |
| Ga South Municipal Hospital (Weija) |
| Shai Osudoku Hospital |
| Tema General Hospital |
| Ashaiman Municipal Hospital |
| Ada East District Hospital |
| Primary Health Facility | Usher Maternity Home (James Town) |
| Kaneshie Polyclinic |
| Osu Government Maternity Home |
| Tema Polyclinic |
| Kenya | |
| Tertiary referral hospitals | Muranga |
| Meru Teaching and Referral Hospital |
| Kiambu |
| Kakamega Teaching and Referral Hospital |
| Jaramogi Oginga Odinga Teaching and Referral Hospital |
| Sub-country hospitals | Ruiru |
| Gatundu |
| Igegania |
| St Mary’s Mumias Hospital |
| Butere |
| Malava |
| Kisumu County hospital |
| Lumumba |
| Ahero |
| Maragua, |
| Kagumo |
| Kangema |
| Nyambene |
| Kiirua |
| Nkubu Mission Hospital |
| South Africa | |
| Hospitals | Mowbray Maternity |
| New Somerset |
| Grootshuur |
| Mitchells Plain |
| Midwife Obstetric Unit (MOU) | Guguleta |
| Mitchells Plain |
| Hanover Park |
| Retreat |
| False Bay |
| Vanguard |
| Dunoon |
| Basic Antenatal Care Clinics | Tafelsig (MPMOU) |
| Westridge (MPMOU) |
| Vuyani (GMOU) |
| Masicendane (GMOU) |
| Heideveld (HvPMOU) |
| Silvertown (HvPMOU) |
| Hout Bay (RMOU) |
| Grassy Park (RMOU) |
| Masiphumulele (FBH) |
| Fishoek (FBH) |
| Langa (VH) |
| Bonteheuvel (VH) |
| Maitland (DN) |
| Factreton (DN) |
| Lentegeur (MPDH) |
| District Six (NSH) |
| Spencer road (NSH) |
| Liesbeek (MMH) |
